# Supplementary material
Source: MDPI journal article supplement (https://www.mdpi.com/2311-7524/8/3/248)
Supplement: s1 [file s1]

**Table S1.** Meteorological data for the vineyard in 2018.

| Month | Average temperature (°C) | Average Humidity (%) | Solar radiation (W/m <sup>2</sup> ) | Rain (mm) |
|-------|--------------------------|----------------------|-------------------------------------|-----------|
| 1     | -0.69                    | 64.80                | 72.40                               | 1.80      |
| 2     | 2.06                     | 56.67                | 104.19                              | 0.60      |
| 3     | 11.48                    | 69.09                | 158.42                              | 22.60     |
| 4     | 17.18                    | 67.30                | 189.27                              | 21.60     |
| 5     | 21.96                    | 76.33                | 210.39                              | 55.00     |
| 6     | 26.59                    | 73.53                | 237.72                              | 24.20     |
| 7     | 29.15                    | 87.51                | 201.30                              | 39.60     |
| 8     | 28.12                    | 88.29                | 189.19                              | 266.80    |
| 9     | 21.27                    | 82.34                | 197.39                              | 44.20     |
| 10    | 13.31                    | 77.67                | 153.13                              | 1.80      |
| 11    | 8.24                     | 87.86                | 81.03                               | 28.20     |
| 12    | 0.87                     | 70.97                | 70.30                               | 5.80      |

**Table S2.** Calibration curves for the quantification of volatile compounds.

| Compounds                  | Calibration curves | r <sup>2</sup> | Linear range (µg/L) |
|----------------------------|--------------------|----------------|---------------------|
| 2-Octanol                  | Internal standard  |                |                     |
| <b>terpenoids</b>          |                    |                |                     |
| limonene                   | y=3.5396x+0.0834   | 0.9992         | 0.36-46.47          |
| γ-terpinene                | y=7.6736x+0.0068   | 0.9997         | 0.24-68.25          |
| citronellol                | y=5.3776x-0.0289   | 0.9968         | 0.35-86.14          |
| β-myrcene                  | y=3.7825x+0.0071   | 0.9999         | 0.48-68.78          |
| α-terpineol                | y=6.9604x-0.09844  | 0.9942         | 0.23-48.84          |
| trans-rose oxide           | y=0.9452x-0.08954  | 0.9991         | 0.27-124.95         |
| <b>norisoprenopids</b>     |                    |                |                     |
| methyl heptenone           | y=11.679x+0.0014   | 0.9936         | 0.44-50.79          |
| <b>C6 alcohols</b>         |                    |                |                     |
| 1-octanol                  | y=4.74x-0.0064     | 0.9978         | 0.24-55.87          |
| 1-hexanol                  | y=15.23x-0.1745    | 0.9974         | 0.36-121.69         |
| 1-octen-3-ol               | y=6.5186x+0.0891   | 0.991          | 0.25-86.45          |
| <b>C6 aldehydes</b>        |                    |                |                     |
| hexanal                    | y=2.8542x-0.0847   | 0.9935         | 1.56-865.45         |
| (E)-2-hexenal              | y=14.685x+1.1056   | 0.9989         | 2.64-1262.64        |
| nonanal                    | y=1.1443x-0.0476   | 0.9924         | 2.25-140.84         |
| decanal                    | y=8.1567x-0.782    | 0.9998         | 1.76-68.46          |
| <b>C6 esters</b>           |                    |                |                     |
| ethyl acetate              | y=2.4186x-0.06912  | 0.9994         | 0.76-564.56         |
| ethyl butanoate            | y=0.8541x+0.9654   | 0.9937         | 0.56-145.71         |
| ethyl caprylate            | y=1.0659x-2.5198   | 0.9984         | 5.95-682.95         |
| ethyl heptanoate           | y=5.1671x-0.5463   | 0.9968         | 0.74-146.68         |
| ethyl 2-hexenoate          | y=2.8914x+4.5168   | 0.9982         | 0.28-468.26         |
| ethyl 3-hexenoate          | y=16.546x+1.5648   | 0.9999         | 0.15-174.96         |
| <b>benzene derivatives</b> |                    |                |                     |
| fluorene                   | y=1.1564x+0.0459   | 0.9969         | 1.81-276.61         |

|                           |                   |        |             |
|---------------------------|-------------------|--------|-------------|
| benzeneacetaldehyde       | y=22.489x-6.5814  | 0.9989 | 0.16-165.95 |
| toluene                   | y=1.9548x+0.07485 | 0.9999 | 0.32-228.64 |
| Benzaldehyde              | y=6.5141x-0.0742  | 0.9934 | 1.88-246.62 |
| ethyl benzoate            | y=1.8446x-0.0927  | 0.9975 | 0.79-554.91 |
| <b>branched volatiles</b> |                   |        |             |
| 2-ethyl-1-hexanol         | y=7.489x-1.9813   | 0.9982 | 0.59-361.63 |
| 1-butanol                 | y=4.746x-0.0984   | 0.9996 | 1.78-164.61 |
| Isobutyl alcohol          | y=2.8455x-0.8749  | 0.9999 | 1.95-582.41 |
| 1-Hexanol                 | y=3.8412x-0.3181  | 0.9974 | 0.49-76.94  |
| Benzene ethanol           | y=1.854x-0.1253   | 0.9959 | 0.24-143.45 |

**Table S3.** Primer sequence for RT-qPCR.

| Gene Name      | GenBank accession | Forward primer (5'-3')   | Reverse primer (5'-3')      |
|----------------|-------------------|--------------------------|-----------------------------|
| <i>VvLOXA</i>  | NM_001281094      | CGTGAGCGAAGTAAGGCAAAT    | TTCCCAGCTAGGCGTAAACA        |
| <i>VvHPL</i>   | HM627632          | AAGTACACCGGCGACATTCGAG   | AGCTCTTTACCCTGGCGTGTTG      |
| <i>VvADH</i>   | AF194173          | TCCGTTCTCAGAGATCAACAA    | ACTCTCTCATCTCAAGATATTCTATGG |
| <i>VvAAT</i>   | AAW22989          | TTAATTCAGGTGACCCGATT     | TCTCCATACACATGCCATTAG       |
| <i>VvActin</i> | EC969944          | GCATCCCTCAGCACCTTCCAGCAG | CCACCTCAACACATCTCCATGTCAACC |

**Table S4.** Effect of seawater treatment on the concentrations and varieties of volatiles in 'Reliance' grape at EL 31.

| Compounds ( $\mu\text{g Kg}^{-1}$ FW) | Treatment          |                    |
|---------------------------------------|--------------------|--------------------|
|                                       | Control            | S1                 |
| isoprene pathway                      | 23.22 $\pm$ 2.55a  | 21.60 $\pm$ 1.27a  |
| terpenoids                            | 19.73 $\pm$ 2.56a  | 18.58 $\pm$ 0.63a  |
| eucalyptol                            | 14.73 $\pm$ 1.70a  | 13.96 $\pm$ 0.53a  |
| limonene                              | 5.00 $\pm$ 0.86a   | 4.62 $\pm$ 0.13a   |
| norisoprenoids                        | 3.49 $\pm$ 0.02a   | 3.02 $\pm$ 0.69a   |
| methyl heptenone                      | 3.49 $\pm$ 0.02a   | 3.02 $\pm$ 0.69a   |
| fatty acid pathway                    | 238.18 $\pm$ 4.34a | 232.04 $\pm$ 6.61a |
| C6 aldehydes                          | 234.29 $\pm$ 4.20a | 229.58 $\pm$ 6.63a |
| hexanal                               | 128.35 $\pm$ 1.90a | 128.89 $\pm$ 4.42a |
| (E)-2-hexenal                         | 78.73 $\pm$ 2.81a  | 76.25 $\pm$ 3.20a  |
| nonanal                               | 21.58 $\pm$ 2.19a  | 21.98 $\pm$ 0.54a  |
| heptanal                              | 3.20 $\pm$ 0.36    | -                  |
| 2-hexenal                             | 2.43 $\pm$ 0.14a   | 2.47 $\pm$ 0.04a   |
| C6 esters                             | 3.90 $\pm$ 0.19a   | 2.45 $\pm$ 0.57b   |
| butyl acrylate                        | 2.37 $\pm$ 0.47a   | 2.45 $\pm$ 0.57a   |
| butyl butanoate                       | 1.53 $\pm$ 0.32    | -                  |
| amino acid pathway                    | 66.94 $\pm$ 2.21a  | 67.12 $\pm$ 5.75a  |
| benzene derivatives                   | 59.62 $\pm$ 2.13a  | 60.01 $\pm$ 5.42a  |
| o-xylene                              | 15.83 $\pm$ 0.62a  | 15.81 $\pm$ 0.73a  |

|                                               |              |              |
|-----------------------------------------------|--------------|--------------|
| toluene                                       | 9.57±1.66a   | 9.35±1.54a   |
| 1,3-dimethyl benzene                          | 7.29±1.38a   | 8.02±0.96a   |
| ethylbenzene                                  | 9.63±0.91a   | 10.30±0.91a  |
| fluorene                                      | 8.34±1.07a   | 7.40±0.88a   |
| dibenzofuran                                  | 7.05±0.11a   | 7.28±1.52a   |
| phenanthrene                                  | 1.91±0.44a   | 1.85±0.57a   |
| branched volatiles                            | 7.32±0.08a   | 7.11±0.48a   |
| 2,2,4-trimethyl-1,4-pentanediol diisobutyrate | 2.48±0.27a   | 2.09±0.45a   |
| 2-ethyl furan                                 | 4.84±0.19a   | 5.02±0.38a   |
| SUM                                           | 328.34±8.93a | 320.75±7.97a |
| Varieties                                     | 19           | 17           |

Values represent the means ± SD of three replicates. “-” means that the compounds were not detected. Different lowercase letters indicate significant differences, according to Tukey multiple comparison post-hoc test at  $P < 0.05$ .

**Table S5.** Effect of seawater treatment on the concentrations and varieties of volatiles in 'Reliance' grape at EL 33.

| Compounds ( $\mu\text{g Kg}^{-1}$ FW)         | Treatment    |              |              |
|-----------------------------------------------|--------------|--------------|--------------|
|                                               | Control      | S1           | S2           |
| isoprene pathway                              | 17.76±0.33b  | 24.60±1.89a  | 20.58±0.91b  |
| terpenoids                                    | 7.52±0.49b   | 12.47±2.00a  | 9.32±1.03ab  |
| limonene                                      | 3.61±0.41b   | 5.82±1.04a   | 4.11±0.82ab  |
| eucalyptol                                    | 2.40±0.32b   | 3.30±0.15a   | 3.05±0.31ab  |
| $\alpha$ -pinene                              | 0.79±0.12a   | 1.53±0.51a   | 0.89±0.17ab  |
| $\beta$ -pinene                               | 0.72±0.34a   | 1.82±0.55a   | 1.27±0.41a   |
| norisoprenopids                               | 10.24±0.55b  | 12.13±0.11a  | 11.27±0.50ab |
| (E)-3,3-dimethyl cyclohexylidene acetaldehyde | 4.95±0.33b   | 6.19±0.23a   | 4.98±0.18b   |
| methyl heptenone                              | 4.08±0.40a   | 4.06±0.32a   | 4.27±0.31a   |
| (Z)-3,3-dimethyl cyclohexylidene acetaldehyde | 1.21±0.18b   | 1.88±0.25a   | 2.02±0.22a   |
| fatty acid pathway                            | 140.01±2.98b | 162.62±2.90a | 168.38±2.69a |
| C6 alcohols                                   | -            | 0.65±0.48b   | 2.13±0.62a   |
| (E)-2-decen-1-ol                              | -            | 0.65±0.48a   | 1.21±0.33a   |
| 1-octen-3-ol                                  | -            | -            | 0.92±0.30    |
| C6 aldehydes                                  | 103.01±1.19b | 113.70±4.46a | 114.95±4.74a |
| hexanal                                       | 53.38±3.31a  | 53.25±2.67a  | 53.20±2.59a  |
| (E)-2-hexenal                                 | 25.82±3.35b  | 34.27±1.36a  | 35.63±0.83a  |
| nonanal                                       | 15.80±0.23a  | 17.54±1.13a  | 17.64±1.87a  |
| decanal                                       | 3.81±0.27b   | 4.04±0.59ab  | 5.22±0.63a   |
| heptanal                                      | 2.00±0.17b   | 2.83±0.39a   | 2.01±0.17b   |
| (E)-2-heptenal                                | 0.94±0.21b   | 1.76±0.33a   | 1.25±0.22ab  |
| 2-hexenal                                     | 1.24±0.51    | -            | -            |
| C6 esters                                     | 37.01±2.16b  | 48.28±2.84a  | 51.30±2.61a  |
| ethyl acetate                                 | 22.24±1.47a  | 22.26±2.63a  | 22.36±0.65a  |
| ethyl butanoate                               | 13.59±2.00b  | 20.95±1.32a  | 23.26±1.99a  |

|                              |              |              |              |
|------------------------------|--------------|--------------|--------------|
| butyl butanoate              | 1.18±0.19a   | 1.39±0.09a   | 1.20±0.25a   |
| ethyl 2-butenate             | -            | 3.08±0.50a   | 3.34±0.75a   |
| butyl acetate                | -            | 0.60±0.13a   | 0.50±0.19a   |
| ethyl propanoate             | -            | -            | 0.64±0.24    |
| amino acid pathway           | 62.94±1.93b  | 75.45±3.82a  | 73.81±3.91a  |
| benzene derivatives          | 42.46±1.40b  | 53.62±2.57a  | 43.66±1.58b  |
| o-xylene                     | 10.71±0.57a  | 12.54±1.28a  | 10.17±1.42a  |
| ethylbenzene                 | 6.75±0.19a   | 6.13±0.78ab  | 4.80±0.78b   |
| fluorene                     | 4.74±0.51a   | 6.15±0.79a   | 4.78±0.28a   |
| 1,3-dimethyl benzene         | 4.37±0.54b   | 6.36±0.34a   | 5.02±0.61b   |
| phenanthrene                 | 2.75±0.07a   | 1.95±0.46b   | 1.68±0.04b   |
| toluene                      | 2.53±0.18b   | 3.32±0.45a   | 2.14±0.25b   |
| 1,2,3-trimethyl benzene      | 2.49±0.30b   | 4.24±0.65a   | 2.87±0.08b   |
| naphthalene                  | 2.52±0.08c   | 3.98±0.32a   | 3.08±0.14b   |
| 2-ethyl toluene              | 1.86±0.60b   | 3.55±0.27a   | 2.69±0.22ab  |
| o-cymene                     | 1.47±0.10b   | 2.58±0.15a   | 1.78±0.20b   |
| dibenzofuran                 | 1.63±0.36a   | 1.90±0.32a   | 2.28±0.63a   |
| indene                       | 0.64±0.10b   | 0.92±0.06a   | 0.53±0.14b   |
| benzeneacetaldehyde          | -            | -            | 1.20±0.37    |
| 1-ethyl-2,3-dimethyl benzene | -            | -            | 0.62±0.10    |
| branched volatiles           | 20.48±0.63b  | 21.83±1.31b  | 30.15±2.54a  |
| 2-ethyl-1-hexanol            | 20.48±0.63b  | 20.68±1.14b  | 26.79±2.51a  |
| 3-methyl butanal             | -            | 1.15±0.51a   | 0.99±0.25a   |
| 2-pentylfuran                | -            | -            | 1.20±0.11    |
| 2-ethyl furan                | -            | -            | 1.17±0.13    |
| SUM                          | 220.71±3.92b | 262.68±8.59a | 262.77±6.33a |
| Varieties                    | 30           | 33           | 39           |

Values represent the means ± SD of three replicates. “-” means that the compounds were not detected. Different lowercase letters indicate significant differences, according to Tukey multiple comparison post-hoc test at  $P < 0.05$ .

**Table S6.** Effect of seawater treatment on the concentrations and varieties of volatiles in 'Reliance' grape at EL 35.

| Compounds (µg Kg <sup>-1</sup> FW) | Treatment    |              |              |              |
|------------------------------------|--------------|--------------|--------------|--------------|
|                                    | Control      | S1           | S2           | S3           |
| isoprene pathway                   | 3.48±0.21b   | 5.45±0.21a   | 3.39±0.64b   | 4.77±0.21a   |
| terpenoids                         | 3.18±0.19ab  | 3.28±0.18a   | 2.26±0.62b   | 2.49±0.21ab  |
| limonene                           | 2.39±0.15a   | 1.86±0.17ab  | 1.63±0.46b   | 1.87±0.08ab  |
| β-pinene                           | 0.49±0.04b   | 0.92±0.03a   | 0.63±0.17ab  | 0.61±0.13b   |
| α-pinene                           | 0.30±0.03b   | 0.50±0.01a   | -            | -            |
| norisoprenopids                    | 1.31±0.11b   | 2.17±0.08a   | 1.13±0.02b   | 2.28±0.32a   |
| methyl heptenone                   | 1.31±0.11b   | 2.17±0.08a   | 1.13±0.02b   | 2.28±0.32a   |
| fatty acid pathway                 | 208.07±8.31a | 185.43±2.49b | 208.34±7.91a | 207.50±9.04a |
| C6 alcohols                        | 0.32±0.04b   | 3.57±0.23a   | 4.36±0.70a   | 2.74±1.27a   |

|                              |              |              |              |              |
|------------------------------|--------------|--------------|--------------|--------------|
| ethanol                      | -            | 2.73±0.24a   | 3.49±0.79a   | 2.32±1.31a   |
| 1-octanol                    | -            | 0.53±0.06a   | 0.61±0.11a   | 0.42±0.09a   |
| 1-heptanol                   | 0.32±0.04a   | 0.31±0.02ab  | 0.26±0.02b   | -            |
| C6 aldehydes                 | 165.94±6.08a | 146.86±3.56b | 144.30±3.33b | 172.30±5.40a |
| hexanal                      | 110.36±4.11a | 94.79±2.13b  | 86.84±3.22b  | 105.83±3.23a |
| (E)-2-hexenal                | 40.12±4.03bc | 35.56±1.06c  | 48.08±1.35ab | 50.74±4.46a  |
| nonanal                      | 10.29±1.10a  | 12.33±0.34a  | 7.41±1.06b   | 12.00±1.33a  |
| decanal                      | 1.45±0.16b   | 2.50±0.35a   | 1.06±0.14b   | 2.70±0.34a   |
| (E)-2-octenal                | -            | 1.25±0.15    | -            | -            |
| (E)-2-heptenal               | 0.42±0.04ab  | 0.44±0.05a   | 0.30±0.07b   | 0.30±0.04b   |
| 2-hexenal                    | 3.30±0.31    | -            | -            | -            |
| (E,E)-2,4-hexadienal         | -            | -            | 0.48±0.13a   | 0.61±0.15a   |
| pentanal                     | -            | -            | 0.12±0.00a   | 0.12±0.05a   |
| C6 esters                    | 41.80±2.27b  | 35.00±2.04bc | 59.68±4.60a  | 32.46±3.12c  |
| ethyl butanoate              | 30.10±1.33a  | 16.49±0.66b  | 20.37±2.74b  | 16.71±2.62b  |
| ethyl acetate                | 5.68±0.95b   | 7.28±0.72b   | 16.79±1.90a  | 8.24±0.35b   |
| ethyl 2-butenate             | -            | 4.41±0.49b   | 6.54±0.73a   | 1.19±0.21c   |
| ethyl valerate               | 2.12±0.07c   | 3.37±0.08a   | 3.06±0.25ab  | 2.64±0.23b   |
| ethyl 3-hexenoate            | 2.37±0.23a   | 1.60±0.22b   | 2.19±0.42ab  | 2.72±0.18a   |
| ethyl 2-hexenoate            | 0.45±0.07b   | 0.77±0.18b   | 1.98±0.15a   | 0.46±0.02b   |
| ethyl heptanoate             | -            | 0.64±0.16b   | 1.27±0.13a   | 0.30±0.11b   |
| ethyl 4-octenoate            | -            | 0.45±0.22b   | 1.15±0.17a   | -            |
| butyl butanoate              | 0.55±0.07a   | -            | -            | 0.19±0.06b   |
| propyl butyrate              | 0.28±0.02    | -            | -            | -            |
| ethyl (E,Z)-2,4-decadienoate | 0.25±0.01b   | -            | 0.75±0.04a   | -            |
| ethyl caprylate              | -            | -            | 4.77±0.36    | -            |
| ethyl (E)-4-heptenoate       | -            | -            | 0.38±0.05    | -            |
| ethyl caprate                | -            | -            | 0.23±0.01    | -            |
| ethyl (E)-4-decenoate        | -            | -            | 0.19±0.03    | -            |
| amino acid pathway           | 32.49±1.26b  | 40.84±2.46a  | 18.67±2.59d  | 25.49±1.64c  |
| benzene derivatives          | 22.54±1.70a  | 24.30±2.97a  | 11.29±2.27b  | 15.68±0.29b  |
| o-xylene                     | 7.22±0.77a   | 6.61±0.95ab  | 3.26±1.02c   | 4.63±0.16bc  |
| 1,3-dimethyl benzene         | 2.93±0.35a   | 2.74±0.45a   | 1.56±0.28b   | 1.88±0.11b   |
| mesitylene                   | 1.97±0.30a   | 2.16±0.23a   | -            | -            |
| fluorene                     | 1.57±0.40ab  | 1.97±0.21a   | 1.25±0.19b   | 1.62±0.14ab  |
| ethyl benzoate               | -            | 1.50±0.11    | -            | -            |
| ethylbenzene                 | 1.54±0.32a   | 1.51±0.22a   | 0.56±0.22b   | 0.95±0.05ab  |
| toluene                      | 1.73±0.22a   | 1.64±0.23ab  | 0.70±0.21c   | 1.14±0.10bc  |
| styrene                      | 1.88±0.20a   | 1.30±0.19b   | 0.80±0.24c   | 1.34±0.07b   |
| p-cymene                     | 0.78±0.05a   | 1.09±0.16a   | 0.91±0.27a   | 0.85±0.04a   |
| dibenzofuran                 | 1.14±0.28a   | 1.00±0.19ab  | 0.63±0.07b   | 0.91±0.09ab  |
| 2-ethyl toluene              | 1.46±0.22a   | 0.93±0.28ab  | 0.50±0.10b   | 1.10±0.29ab  |
| naphthalene                  | -            | 0.77±0.01a   | 0.45±0.09b   | 0.50±0.06b   |
| phenanthrene                 | 0.33±0.05a   | 0.44±0.14a   | 0.32±0.02a   | 0.44±0.08a   |

|                                 |              |              |               |               |
|---------------------------------|--------------|--------------|---------------|---------------|
| benzeneacetaldehyde             | -            | 0.65±0.29a   | 0.37±0.07a    | 0.31±0.06a    |
| branched volatiles              | 9.95±0.45b   | 16.54±0.57a  | 7.38±0.43c    | 9.81±1.40b    |
| 2-ethyl-1-hexanol               | 7.74±0.72b   | 14.99±0.68a  | 5.51±0.35c    | 8.35±1.17b    |
| 2,2,4-trimethyl-1,4-pentanediol | 1.20±0.11a   | 1.10±0.11a   | 0.77±0.16a    | 1.22±0.33a    |
| diisobutyrate                   | -            | -            | -             | -             |
| ethyl 4-methyl pentanoate       | -            | 0.45±0.12a   | 0.70±0.21a    | -             |
| 2,2-dimethyl-3-heptanone        | 1.01±0.18    | -            | -             | -             |
| ethyl 3-methyl-2-butenate       | -            | -            | -             | 0.23±0.02     |
| 2-ethyl furan                   | -            | -            | 0.39±0.07     | -             |
| SUM                             | 245.05±6.86a | 231.72±0.55a | 230.40±10.67a | 237.75±10.69a |
| Varieties                       | 33           | 38           | 42            | 35            |

Values represent the means ± SD of three replicates. “-” means that the compounds were not detected. Different lowercase letters indicate significant differences, according to Tukey multiple comparison post-hoc test at P < 0.05.

**Table S7.** Effect of seawater treatment on the concentrations and varieties of volatiles in 'Reliance' grape at EL 36.

| Compounds (µg Kg <sup>-1</sup> FW) | Treatment    |              |               |               |
|------------------------------------|--------------|--------------|---------------|---------------|
|                                    | Control      | S1           | S2            | S3            |
| isoprene pathway                   | 2.18±0.43a   | 2.25±0.25a   | 3.21±0.69a    | 2.58±0.48a    |
| terpenoids                         | 2.18±0.43a   | 2.25±0.25a   | 3.21±0.69a    | 2.58±0.48a    |
| limonene                           | 2.18±0.43a   | 2.25±0.25a   | 3.21±0.69a    | 2.58±0.48a    |
| fatty acid pathway                 | 266.94±9.23b | 395.29±7.79a | 390.50±8.37a  | 276.69±14.41b |
| C6 aldehydes                       | 207.36±7.37c | 281.21±2.06a | 268.67±8.70a  | 242.84±14.56b |
| hexanal                            | 143.88±5.36b | 193.64±2.33a | 191.53±11.16a | 160.47±11.36b |
| (E)-2-hexenal                      | 43.46±3.91b  | 65.27±4.23a  | 56.09±1.58a   | 63.69±5.26a   |
| nonanal                            | 9.64±0.54b   | 14.32±0.84a  | 11.93±0.57ab  | 11.12±1.46b   |
| 4-oxo-2-hexenal                    | 8.17±0.62a   | 5.38±0.73a   | 6.25±1.26a    | 5.55±1.90a    |
| decanal                            | 2.22±0.38ab  | 2.60±0.21ab  | 2.86±0.45a    | 2.01±0.11b    |
| C6 esters                          | 59.58±5.21b  | 114.08±8.14a | 121.84±1.06a  | 33.85±1.94c   |
| ethyl acetate                      | 29.13±1.67c  | 45.71±2.58b  | 51.76±1.70a   | 15.16±1.69d   |
| ethyl butanoate                    | 13.73±1.95b  | 21.01±1.32a  | 21.15±2.30a   | 14.60±0.67b   |
| ethyl 2-butenate                   | 4.29±0.75b   | 14.29±1.24a  | 14.65±0.89a   | -             |
| ethyl 2-hexenoate                  | 2.81±0.54ab  | 2.41±0.19b   | 3.46±0.21a    | -             |
| ethyl valerate                     | 3.10±0.37a   | 2.83±0.34a   | 3.00±0.26a    | 2.66±0.36a    |
| ethyl heptanoate                   | 2.50±0.50ab  | 3.28±0.42a   | 3.34±0.51a    | 1.43±0.56b    |
| ethyl 3-hexenoate                  | 2.03±0.49a   | 1.95±0.84a   | 2.05±0.11a    | -             |
| ethyl (E,Z)-2,4-decadienoate       | 1.19±0.52b   | 2.81±0.46a   | 2.42±0.23a    | -             |
| ethyl caprate                      | 0.80±0.20    | -            | -             | -             |
| ethyl caprylate                    | -            | 16.80±1.37a  | 16.54±1.03a   | -             |
| ethyl 4-octenoate                  | -            | 3.00±0.63a   | 3.45±0.62a    | -             |
| amino acid pathway                 | 17.13±0.98b  | 18.37±1.06ab | 19.05±1.87ab  | 21.06±1.21a   |
| benzene derivatives                | 6.35±0.86b   | 11.21±0.76a  | 10.95±1.45a   | 11.92±0.96a   |
| fluorene                           | 1.98±0.14a   | 2.70±0.51a   | 2.31±0.16a    | 2.57±0.70a    |

|                                 |               |              |              |               |
|---------------------------------|---------------|--------------|--------------|---------------|
| dibenzofuran                    | 1.89±0.25a    | 2.60±0.40a   | 2.05±0.50a   | 2.16±0.38a    |
| o-xylene                        | 1.52±0.68b    | 2.74±0.14a   | 3.02±0.38a   | 3.39±0.04a    |
| toluene                         | 0.96±0.29b    | 1.57±0.13a   | 1.63±0.16a   | 1.89±0.07a    |
| 1,3-dimethyl benzene            | -             | 1.59±0.15a   | 1.94±0.79a   | 1.93±0.15a    |
| branched volatiles              | 10.78±0.75a   | 7.16±0.31c   | 8.09±0.78b   | 9.13±0.35bc   |
| 2-ethyl-1-hexanol               | -             | -            | -            | 1.57±0.13     |
| 2,2,4-trimethyl-1,4-pentanediol | 2.25±0.20a    | 2.32±0.33a   | 2.28±0.10a   | 1.94±0.22a    |
| diisobutyrate                   |               |              |              |               |
| 2,2-dimethyl-3-heptanone        | 8.54±0.54a    | 4.84±0.08b   | 5.81±0.79b   | 4.56±0.25b    |
| 2-ethyl furan                   | -             | -            | -            | 1.06±0.39     |
| SUM                             | 286.25±10.01b | 423.69±9.19a | 419.36±9.73a | 303.87±16.11b |
| Varieties                       | 21            | 24           | 24           | 20            |

Values represent the means  $\pm$  SD of three replicates. “-” means that the compounds were not detected. Different lowercase letters indicate significant differences, according to Tukey multiple comparison post-hoc test at  $P < 0.05$ .

**Table S8.** Effect of seawater treatment on the concentrations and varieties of volatiles in 'Reliance' grape at EL 37.

| Compounds ( $\mu\text{g Kg}^{-1}$ FW) | Treatment     |               |               |               |
|---------------------------------------|---------------|---------------|---------------|---------------|
|                                       | Control       | S1            | S2            | S3            |
| isoprene pathway                      | 18.49±2.02b   | 27.68±4.05a   | 19.49±2.36b   | 20.69±1.21b   |
| terpenoids                            | 15.86±1.05b   | 24.09±3.63a   | 17.23±2.59b   | 16.34±1.52b   |
| limonene                              | 7.62±1.24a    | 11.16±1.80a   | 9.84±1.42a    | 10.21±0.99a   |
| 2-carene                              | 1.93±0.32a    | 1.74±0.41a    | 1.74±0.55a    | 1.10±0.22a    |
| eucalyptol                            | 1.74±0.35a    | 1.39±0.22a    | 1.23±0.23a    | 1.07±0.21a    |
| $\beta$ -pinene                       | 0.96±0.31a    | 1.86±0.10a    | 1.50±0.46a    | 1.51±0.48a    |
| 4-thujanol                            | 1.35±0.09a    | -             | 1.28±0.10a    | -             |
| $\gamma$ -terpinene                   | 1.44±0.43a    | 1.61±0.48a    | -             | 1.63±0.28a    |
| $\alpha$ -pinene                      | 0.83±0.42a    | 1.26±0.15a    | 0.73±0.23a    | 0.82±0.12a    |
| $\beta$ -myrcene                      | -             | 5.06±0.96     | -             | -             |
| sabinene                              | -             | -             | 0.89±0.32     | -             |
| norisoprenopids                       | 2.63±1.06b    | 3.59±0.43ab   | 2.26±0.44b    | 4.35±0.31a    |
| methyl heptenone                      | 2.63±1.06a    | 3.59±0.43a    | 2.26±0.44a    | 3.44±0.43a    |
| $\beta$ -ionone                       | -             | -             | -             | 0.91±0.29     |
| fatty acid pathway                    | 407.92±11.98b | 479.65±4.57a  | 497.17±1.57a  | 414.48±5.46b  |
| C6 alcohols                           | 5.75±0.72a    | 2.34±0.38b    | -             | 2.51±0.59b    |
| 1-hexanol                             | 5.75±0.72a    | 1.26±0.20b    | -             | 1.28±0.41b    |
| 1-octanol                             | -             | 1.07±0.21a    | -             | 1.22±0.34a    |
| C6 aldehydes                          | 196.02±6.39c  | 217.07±9.33ab | 206.84±3.36bc | 232.08±7.02a  |
| hexanal                               | 107.46±3.06b  | 110.86±5.22ab | 122.87±3.14a  | 117.08±7.20ab |
| (E)-2-hexenal                         | 70.69±2.64ab  | 74.84±3.53a   | 58.24±5.05b   | 77.90±6.87a   |
| nonanal                               | 11.23±1.12c   | 23.49±2.04a   | 17.78±1.08b   | 23.99±1.72a   |
| decanal                               | 3.87±0.65b    | 7.88±0.97a    | 5.44±0.23ab   | 7.81±2.06a    |
| 4-oxo-2-hexenal                       | 2.76±0.22a    | -             | 2.51±0.59a    | 4.06±0.92a    |

|                                  |              |              |              |               |
|----------------------------------|--------------|--------------|--------------|---------------|
| (E)-2-heptenal                   | -            | -            | -            | 1.24±0.09     |
| C6 esters                        | 206.16±6.73c | 260.25±6.57b | 290.33±1.91a | 179.89±11.95d |
| ethyl butanoate                  | 58.20±2.91a  | 63.54±8.09a  | 59.23±5.29a  | 56.06±6.49a   |
| ethyl acetate                    | 52.51±4.36b  | 62.45±2.05a  | 65.80±3.09a  | 51.18±4.20b   |
| ethyl caprylate                  | 24.08±1.83b  | 33.93±2.02a  | 39.08±3.27a  | 16.94±2.61c   |
| ethyl (E,Z)-2,4-decadienoate     | 18.00±1.54bc | 23.34±2.56b  | 34.44±2.06a  | 9.94±5.51c    |
| ethyl valerate                   | 14.39±1.55a  | 9.75±1.10b   | 9.17±0.81b   | 8.12±1.65b    |
| ethyl (Z)-2-butenolate           | 7.66±1.15    | -            | -            | -             |
| ethyl 2-hexenoate                | 5.66±0.98b   | 12.24±1.68a  | 15.34±1.42a  | 6.79±0.88b    |
| ethyl 3-hexenoate                | 5.14±0.99a   | 4.68±0.39a   | -            | 4.33±0.39a    |
| ethyl heptanoate                 | 4.17±0.36b   | 8.81±1.12a   | 11.22±0.85a  | 5.68±1.71b    |
| ethyl sorbate                    | 3.09±0.52b   | 5.95±0.48a   | 8.06±0.67a   | 3.48±1.48b    |
| ethyl (E)-4-hexenoate            | 2.70±1.04ab  | 3.01±0.26ab  | 4.01±0.10a   | 2.08±0.23b    |
| butyl butanoate                  | 2.22±0.94a   | 1.85±0.20a   | 1.11±0.27a   | 2.03±0.29a    |
| ethyl caprate                    | 1.71±0.46b   | -            | 5.14±0.74a   | -             |
| ethyl (E)-2-octenoate            | 2.02±0.56c   | 5.90±0.57b   | 10.33±0.03a  | 2.40±1.19c    |
| ethyl 4-octenoate                | 1.36±0.08c   | 3.49±0.75b   | 5.44±0.70a   | 2.30±1.05bc   |
| ethyl propanoate                 | 1.88±0.63a   | 1.68±0.61a   | 1.58±0.24a   | 0.95±0.10a    |
| ethyl (E)-2-decenoate            | 1.37±0.73    | -            | -            | -             |
| ethyl (E)-4-decenoate            | -            | 9.98±1.84a   | 6.98±1.06a   | -             |
| ethyl 2-butenolate               | -            | 9.66±0.79a   | 13.38±1.99a  | 6.94±5.19a    |
| propyl butyrate                  | -            | -            | -            | 0.68±0.17     |
| amino acid pathway               | 61.69±5.79a  | 65.42±3.93a  | 46.14±2.47b  | 64.88±5.73a   |
| benzene derivatives              | 38.30±3.15a  | 40.34±3.22a  | 31.87±2.28a  | 35.74±6.05a   |
| fluorene                         | 11.29±1.11a  | 6.55±0.98ab  | 4.91±0.79b   | 7.76±4.08ab   |
| dibenzofuran                     | 5.59±1.23a   | 4.60±0.67a   | 3.87±0.95a   | 4.29±2.32a    |
| o-xylene                         | 5.70±1.08a   | 8.18±1.73a   | 6.27±0.98a   | 5.12±0.69a    |
| phenanthrene                     | 2.76±0.65a   | 2.02±0.17a   | 1.67±0.79a   | 2.30±0.87a    |
| 2-ethyl toluene                  | 3.18±1.20a   | 2.61±0.78a   | 1.96±0.46a   | 2.91±0.47a    |
| o-cymene                         | 3.35±1.16a   | 3.30±0.59a   | 3.04±0.52a   | 3.16±0.32a    |
| 1,3-dimethyl benzene             | 1.77±0.36b   | 3.59±0.37a   | 3.00±0.21a   | 3.10±0.44a    |
| 4-methyl dibenzofuran            | 1.61±0.36a   | -            | 0.72±0.49a   | -             |
| toluene                          | 1.22±0.29a   | 1.37±0.14a   | 1.35±0.07a   | 0.99±0.27a    |
| benzeneacetaldehyde              | 1.33±0.56a   | 1.45±0.27a   | 1.04±0.40a   | -             |
| ethylbenzene                     | 0.50±0.34a   | 0.94±0.18a   | 0.94±0.19a   | 0.68±0.17a    |
| naphthalene                      | -            | 4.53±1.01a   | 3.10±0.09a   | 4.83±0.85a    |
| 2,4-dimethyl benzaldehyde        | -            | 0.88±0.34    | -            | -             |
| acenaphthylene                   | -            | 0.32±0.07    | -            | -             |
| 1-ethyl-2,3-dimethyl benzene     | -            | -            | -            | 0.61±0.28     |
| branched volatiles               | 23.39±2.87b  | 25.08±0.85ab | 14.28±0.48c  | 29.14±2.05a   |
| 2-ethyl-1-hexanol                | 18.08±1.34b  | 20.54±0.73ab | 8.55±0.86c   | 22.14±1.74a   |
| 3-methyl butanal                 | 0.94±0.40a   | 0.65±0.27a   | -            | 1.21±0.14a    |
| isopropyl hexanoate              | 1.67±0.49a   | 3.25±1.01a   | 3.15±0.37a   | 3.49±0.77a    |
| ethyl 6-methyl-2,4-heptadienoate | 1.43±0.63a   | -            | 2.58±0.82a   | 2.29±0.55a    |



|                          |               |              |              |               |
|--------------------------|---------------|--------------|--------------|---------------|
| 2,2-dimethyl-3-heptanone | 1.27±0.40     | -            | -            | -             |
| isoamyl acetate          | -             | 0.65±0.10    | -            | -             |
| SUM                      | 488.10±17.36b | 572.76±8.76a | 562.79±4.93a | 500.04±11.82b |
| Varieties                | 47            | 47           | 44           | 47            |

Values represent the means  $\pm$  SD of three replicates. “-” means that the compounds were not detected. Different lowercase letters indicate significant differences, according to Tukey multiple comparison post-hoc test at  $P < 0.05$ .
